# Supplementary material for: Noninvasive Prediction of Extrathyroidal Extension in Papillary Thyroid Carcinoma using Multiparametric MRI Radiomics and ADC Normalization
Source: Research Square preprint supplement (doi:10.21203/rs.3.rs-7513174/v1), 2025-10-23
Supplement: Supplementary file 1 [file a06ef1e4787f8b4146eeb0bb.docx]

**Supplementary Material**

**Table of content**

**MRI Protocol**

**Table S1.** Parameters of MRI sequence

**Table S2.** Univariate analysis of clinical characteristics of patients in the training cohort

**Table S3.** Radiomics Feature Selection Procedure

**Table S4.** Selected Features and their Coefficients of the T2WI, DWI, ADC, DelayCE and Merged Models

**Table S5.** Comparison of Six Machine Learning Models Using Merged T2WI, DWI, ADC, and delayCE Images for Diagnostic Performance

**Table S6.** The diagnostic performance of individual and merged models using machine learning method based on ADC, T2WI, DWI, and delayCE

**Figure S1** The performance of the gross extrathyroidal extension (ETE)-predicting nomogram via 10-fold cross-validation in training and test cohorts

**MRI Protocol**

The MRI protocol encompassed various sequences, including coronal and axial T2-weighted imaging, axial T1-weighted imaging, diffusion-weighted imaging at b values of 0 and 800 s/mm², and axial multiphasic contrast-enhanced T1-weighted imaging. The Gadolinium-based contrast agent (Magnevist; Bayer Healthcare, Berlin, Germany) was administered at a rate of 3 ml/s (0.2 ml/kg), with a subsequent flush of 20ml of physiological saline. Imaging was conducted at specific time intervals (30s, 60s, 120s, 180s, 240s, and 300s) post-contrast agent injection, with patients instructed to hold their breath during scanning. For a detailed overview of the MRI protocols utilized, please refer to the Table S1.

**Table S1.** Parameters of MRI sequence

| **MR scanner** | **MRI sequence** | **Plane** | **Repetition time**  **(ms)** | **Echo time**  **(ms)** | **Slice thickness**  **(mm)** | **Slice gap**  **(mm)** | **Number of excitations** | **Field of view**  **(cm)** | **Matrix size** | **Sequence** |
| --- | --- | --- | --- | --- | --- | --- | --- | --- | --- | --- |
| 1.5 Tesla | T2WI with fat suppression | Coronal | 1300 | 81.2 | 4 | 0.5 | 4 | 20 | 288×192 | FRFSE |
|  | T1WI | Axial | 540 | 10.6 | 4 | 0.5 | 2 | 20 | 288×224 | FSE-XL |
|  | T2WI with fat suppression | Axial | 3000 | 86.9 | 4 | 0.5 | 2 | 20 | 320×224 | FRFSE |
|  | DWI | Axial | 6550 | 85 | 4 | 0.5 | 8 | 20 | 128×128 | SE-EPI |
|  | Contrast-enhanced T1WI | Axial | 5.5 | 1.6 | 4 | -2 | 1 | 25 | 256×192 | FSPGR |
| 3.0 Tesla | T2WI with fat suppression | Coronal | 5782 | 85.4 | 3 | 0.6 | 1.6 | 20*20 | 240×264 | FSE |
|  | T1WI | Axial | 613 | 8.56 | 3 | 0.6 | 2 | 18*18 | 256×204.8 | FSE |
|  | T2WI with fat suppression | Axial | 7582 | 74.2 | 3 | 0.6 | 3 | 18*18 | 256×256 | DE |
|  | DWI | Axial | 3550 | 71 | 3 | 0.6 | 15 | 16*8 | 128×115.2 | SE-EPI |
|  | Contrast-enhanced T1WI | Axial | 6.26 | 1.86 | 4.5 | -1.5 | 1.5 | 22*16 | 304×258.4 | GRE_sp |

**Abbreviations:** T2WI, T2-weighted imaging; T1WI, T1-weighted imaging; DWI, diffusion-weighted imaging; FRFSE, fast recovery fast spin echo; FSE, fast spin echo; SS-EPI, single shot echo-planar imaging; FSPGR, fast spoiled gradient echo; GRE_sp, spoiled gradient echo; DE, Driven Equilibrium.

**Table S2.** Univariate analysis of clinical characteristics of patients in the training cohort

| **characteristics** | **no-ETE (N=72)** | **ETE (N=30)** | **Odds ratio (95% CI)** | **P value** |
| --- | --- | --- | --- | --- |
| **Sex, n (%)** |  |  |  | 0.877 |
| female | 50 (69.4) | 22 (73.3) | Ref. |  |
| male | 22 (30.6) | 8 (26.7) | 0.83 [0.30;2.13] |  |
| **Location, n (%)** |  |  |  | 0.127 |
| isthmus | 1 (1.39) | 3 (10.0) | Ref. |  |
| Left | 30 (41.7) | 10 (33.3) | 0.13 [0.00;1.23] |  |
| right | 41 (56.9) | 17 (56.7) | 0.15 [0.01;1.44] |  |
| **Tumor number, n (%)** |  |  |  | 0.112 |
| multifocal | 14 (19.4) | 11 (36.7) | Ref. |  |
| unifocal | 58 (80.6) | 19 (63.3) | 0.42 [0.16;1.10] |  |
| **HT, n (%)** |  |  |  | 0.620 |
| absent | 50 (69.4) | 23 (76.7) | Ref. |  |
| present | 22 (30.6) | 7 (23.3) | 0.70 [0.24;1.83] |  |
| **LDH (U/L)** | 143 [132;154] | 143 [133;157] | 1.01 [1.00;1.02] | 0.559 |
| **TSH (ulU/ml)** | 2.71 [1.48;3.06] | 2.71 [2.38;3.82] | 1.05 [0.88;1.25] | 0.113 |
| **T3 (nmol/L)** | 1.67 [1.52;1.79] | 1.65 [1.49;1.67] | 0.47 [0.11;2.11] | 0.231 |
| **T4 (nmol/L)** | 98.2 [90.1;101] | 96.9 [85.0;98.2] | 0.97 [0.94;1.00] | 0.140 |
| **F_T4 (pmol/L)** | 16.5 [15.2;17.6] | 16.5 [15.0;16.7] | 0.81 [0.66;1.01] | 0.263 |
| **F_T3 (pmol/L)** | 4.79 [4.55;4.96] | 4.67 [4.27;4.79] | 0.60 [0.30;1.20] | 0.069 |

**Abbreviations:** n, number of lesions;HT, Hashimoto's thyroiditis; LDH, lactate dehydrogenase; TSH, thyroid stimulating hormone; T3, triiodothyronine; T4, thyroxine; F_T3, free triiodothyronine; F_T4, free thyroxine; ETE, extrathyroidal extension; *, P<0.05.

**Table S3.** Radiomics Feature Selection Procedure

| **sequence** | **Total feature** | **interobserver ICCs > 0.8** | **P<0.05** | **Pearson correlation coefficient > 0.9** | **mRMR** | **LASSO** |
| --- | --- | --- | --- | --- | --- | --- |
| T2WI | 1106 | 1016 | 246 | 77 | 10 | 8 |
| DWI | 1106 | 1039 | 176 | 50 | 10 | 1 |
| ADC | 1106 | 848 | 74 | 28 | 10 | 10 |
| delayCE | 1106 | 938 | 227 | 60 | 10 | 8 |
| T2WI+DWI+ADC | 3318 | 2900 | 492 | 150 | 10 | 5 |
| T2WI+DWI+ADC+delayCE | 4424 | 3837 | 717 | 209 | 10 | 8 |

**Abbreviations:** ICC, Intraclass correlation coefficient; mRMR, minimum-redundancy maximum-relevance; LASSO, least absolute shrinkage and selection operator.

**Table S4** Selected Features and their Coefficients of the T2WI, DWI, ADC, DelayCE and Merged Models

|  | Selected features | Coefficients |
| --- | --- | --- |
| T2WI Model | wavelet_LHL_ngtdm_Contrast_T2WI | -0.037126 |
| wavelet_LLL_glcm_Correlation_T2WI | 0.007966 |
| wavelet_HLL_glszm_LargeAreaHighGrayLevelEmphasis_T2WI | 0.041688 |
| original_glszm_ZoneVariance_T2WI | 0.078862 |
| log_sigma_3_0_mm_3D_ngtdm_Strength_T2WI | -0.002514 |
| wavelet_LLL_ngtdm_Coarseness_T2WI | -0.043650 |
| log_sigma_3_0_mm_3D_gldm_DependenceVariance_T2WI | 0.062120 |
| wavelet_LHL_glszm_LargeAreaHighGrayLevelEmphasis_T2WI | 0.047284 |
| DWI Model | wavelet_HLH_glrlm_RunVariance_DWI | 0.068286 |
| ADC Model | wavelet_LHH_glszm_ZoneVariance_ADC | -0.053212 |
| log_sigma_3_0_mm_3D_glrlm_ShortRunLowGrayLevelEmphasis_ADC | -0.100188 |
| wavelet_LLH_firstorder_Mean_ADC | +0.033528 |
| original_glcm_ClusterTendency_ADC | -0.015979 |
| wavelet_HLH_glszm_LargeAreaHighGrayLevelEmphasis_ADC | +0.039776 |
| original_glcm_Imc1_ADC | +0.087691 |
| wavelet_LLL_firstorder_Minimum_ADC | -0.098678 |
| log_sigma_1_0_mm_3D_ngtdm_Strength_ADC | -0.027289 |
| wavelet_LLL_glszm_GrayLevelNonUniformity_ADC | +0.031659 |
| wavelet_HLH_glcm_MaximumProbability_ADC | +0.104582 |
| delayCE Model | original_shape_Maximum2DDiameterSlice_delay_CE | 0.070852 |
| log_sigma_3_0_mm_3D_gldm_DependenceNonUniformityNormalized_delay_CE | 0.097156 |
| log_sigma_1_0_mm_3D_glcm_Imc1_delay_CE | 0.063098 |
| wavelet_HHH_glszm_LargeAreaLowGrayLevelEmphasis_delay_CE | 0.036393 |
| log_sigma_3_0_mm_3D_firstorder_Maximum_delay_CE | 0.048405 |
| wavelet_LLH_glszm_HighGrayLevelZoneEmphasis_delay_CE | 0.012789 |
| wavelet_LLH_glcm_Correlation_delay_CE | 0.070920 |
| wavelet_LHH_glszm_LargeAreaHighGrayLevelEmphasis_delay_CE | 0.024890 |
| Merged Model 1  (T2WI_DWI_ADC) | wavelet_LHL_ngtdm_Contrast_T2WI | -0.041884 |
| log_sigma_3_0_mm_3D_firstorder_Kurtosis_DWI | 0.024048 |
| wavelet_HLH_glrlm_RunVariance_DWI | 0.102072 |
| log_sigma_3_0_mm_3D_gldm_DependenceVariance_T2WI | 0.077713 |
| log_sigma_3_0_mm_3D_glrlm_ShortRunLowGrayLevelEmphasis_ADC | -0.028943 |
| Merged Model 2  (T2WI_DWI_ADC_delayCE) | log_sigma_3_0_mm_3D_gldm_DependenceVariance_T2WI | 0.086868 |
| wavelet_HLH_glrlm_RunVariance_DWI | 0.078122 |
| log_sigma_1_0_mm_3D_glcm_Imc1_delay_CE | 0.070751 |
| log_sigma_3_0_mm_3D_glrlm_LongRunHighGrayLevelEmphasis_delay_CE | 0.046499 |
| original_shape_Maximum2DDiameterSlice_delay_CE | 0.031408 |
| log_sigma_3_0_mm_3D_firstorder_Kurtosis_DWI | 0.004200 |
| log_sigma_2_0_mm_3D_glrlm_ShortRunLowGrayLevelEmphasis_DWI | -0.000614 |
| wavelet_LHL_ngtdm_Contrast_T2WI | -0.021089 |

**Abbreviations:** ADC, apparent diffusion coefficient; T2WI, T2-weighted image; DWI, diffusion-weighted imaging; delayCE, delayed-phase contrast-enhanced.

**Table S5** Comparison of Six Machine Learning Models Using Merged T2WI, DWI, ADC, and delayCE Sequences for Diagnostic Performance

| **Models** | **Machine Learning** | **Cohort** | **Accuracy** | **AUC (95% CI)** | | **Sensitivity** | **Specificity** | **PPV** | **NPV** |
| --- | --- | --- | --- | --- | --- | --- | --- | --- | --- |
| **Merged_1 Model**  **(T2WI+DWI+ADC)** | **LR** | Training | 0.657 | 0.796 | 0.7044 - 0.8882 | 0.833 | 0.583 | 0.455 | 0.894 |
|  | Test | 0.632 | 0.811 | 0.6568 - 0.9653 | 0.857 | 0.581 | 0.316 | 0.947 |
| **SVM** | Training | 0.824 | 0.865 | 0.7697 - 0.9608 | 0.867 | 0.806 | 0.650 | 0.935 |
|  | Test | 0.816 | 0.700 | 0.4299 - 0.9711 | 0.429 | 0.903 | 0.500 | 0.875 |
| **RandomForest** | Training | 0.863 | 0.927 | 0.8716 - 0.9826 | 0.767 | 0.903 | 0.767 | 0.903 |
|  | Test | 0.789 | 0.825 | 0.6585 - 0.9913 | 0.714 | 0.806 | 0.455 | 0.926 |
| **XGBoost** | Training | 0.922 | 0.984 | 0.9654 - 1.0000 | 0.933 | 0.917 | 0.824 | 0.971 |
|  | Test | 0.816 | 0.848 | 0.6862 - 1.0000 | 0.429 | 0.903 | 0.500 | 0.875 |
| **LightGBM** | Training | 0.765 | 0.898 | 0.8363 - 0.9605 | 0.867 | 0.722 | 0.565 | 0.929 |
|  | Test | 0.789 | 0.804 | 0.6197 - 0.9886 | 0.429 | 0.871 | 0.429 | 0.871 |
| **ExtraTrees** | Training | 0.735 | 0.859 | 0.7845 - 0.9336 | 0.800 | 0.708 | 0.533 | 0.895 |
|  | Test | 0.658 | 0.753 | 0.5838 - 0.9231 | 0.714 | 0.645 | 0.312 | 0.909 |
| **Merged_2 Model**  **(T2WI+DWI+ADC+delayCE)** | **LR** | Training | 0.804 | 0.833 | 0.7460 - 0.9197 | 0.633 | 0.875 | 0.679 | 0.851 |
|  | Test | 0.684 | 0.853 | 0.7146 - 0.9905 | 0.857 | 0.645 | 0.353 | 0.952 |
| **SVM** | Training | 0.882 | 0.911 | 0.8338 - 0.9874 | 0.800 | 0.917 | 0.800 | 0.917 |
|  | Test | 0.658 | 0.747 | 0.5195 - 0.9735 | 0.714 | 0.645 | 0.312 | 0.909 |
| **RandomForest** | Training | 0.853 | 0.947 | 0.9074 - 0.9870 | 0.867 | 0.847 | 0.703 | 0.938 |
|  | Test | 0.421 | 0.650 | 0.4227 - 0.8768 | 0.857 | 0.323 | 0.222 | 0.909 |
| **XGBoost** | Training | 0.951 | 0.996 | 0.9896 - 1.0000 | 0.900 | 0.972 | 0.931 | 0.959 |
|  | Test | 0.763 | 0.829 | 0.6696 - 0.9894 | 0.714 | 0.774 | 0.417 | 0.923 |
| **LightGBM** | Training | 0.873 | 0.918 | 0.8537 - 0.9829 | 0.800 | 0.903 | 0.774 | 0.915 |
|  | Test | 0.737 | 0.786 | 0.6229 - 0.9485 | 0.714 | 0.742 | 0.385 | 0.920 |
| **ExtraTrees** | Training | 0.804 | 0.877 | 0.8099 - 0.9443 | 0.700 | 0.847 | 0.656 | 0.871 |
|  | Test | 0.868 | 0.853 | 0.7053 - 0.9997 | 0.571 | 0.935 | 0.667 | 0.906 |

**Abbreviations:** PPV, positive predictive value; NPV, negative predictive value; AUC, area under the curve; ADC, apparent diffusion coefficient; T2WI, T2-weighted imaging; DWI, diffusion-weighted imaging; delayCE, delayed-phase contrast-enhanced; LR, Logistic Regression; SVM, Support Vector Machine; XGBoost, eXtreme Gradient Boosting; LightGBM, Light Gradient Boosting Machine; ExtraTrees, Extremely Randomized Trees.

**Table S6** The diagnostic performance of individual and merged models using machine learning method based on ADC, T2WI, DWI, and delayCE

| **Models** | **Cohort** | **Accuracy** | **AUC (95% CI)** | | **Sensitivity** | **Specificity** | **PPV** | **NPV** |
| --- | --- | --- | --- | --- | --- | --- | --- | --- |
| **rad_T2WI_LR** | Training | 0.765 | 0.800 | 0.7044 - 0.8956 | 0.633 | 0.819 | 0.594 | 0.843 |
| Test | 0.684 | 0.742 | 0.5789 - 0.9050 | 0.857 | 0.645 | 0.353 | 0.952 |
| **rad_DWI_LightGBM** | Training | 0.686 | 0.743 | 0.6422 - 0.8439 | 0.567 | 0.736 | 0.472 | 0.803 |
| Test | 0.658 | 0.687 | 0.4365 - 0.9368 | 0.429 | 0.710 | 0.250 | 0.846 |
| **rad_ADC_LightGBM** | Training | 0.892 | 0.967 | 0.9395 - 0.9953 | 0.933 | 0.875 | 0.757 | 0.969 |
| Test | 0.500 | 0.645 | 0.4392 - 0.8512 | 0.714 | 0.452 | 0.227 | 0.875 |
| **rad_delayCE_SVM** | Training | 0.784 | 0.875 | 0.7967 - 0.9533 | 0.867 | 0.750 | 0.591 | 0.784 |
| Test | 0.737 | 0.512 | 0.2350 - 0.7880 | 0.143 | 0.871 | 0.200 | 0.818 |
| **rad_T2WI+DWI+ADC_XGBoost** | Training | 0.922 | 0.984 | 0.9654 - 1.0000 | 0.933 | 0.917 | 0.824 | 0.971 |
| Test | 0.816 | 0.848 | 0.6862 - 1.0000 | 0.429 | 0.903 | 0.500 | 0.875 |
| **rad_T2WI+DWI+ADC+delayCE_ExtraTrees** | Training | 0.804 | 0.877 | 0.8099 - 0.9443 | 0.700 | 0.847 | 0.656 | 0.871 |
| Test | 0.868 | 0.853 | 0.7053 - 0.9997 | 0.571 | 0.935 | 0.667 | 0.906 |

**Abbreviations:** LR, Logistic Regression; PPV, positive predictive value; NPV, negative predictive value; AUC, area under the curve; ADC, apparent diffusion coefficient; T2WI, T2-weighted imaging; DWI, diffusion-weighted imaging; delayCE, delayed-phase contrast-enhanced; rad, radiomics; LR, Logistic Regression; SVM, Support Vector Machine; XGBoost, eXtreme Gradient Boosting; LightGBM, Light Gradient Boosting Machine; ExtraTrees, Extremely Randomized Trees.


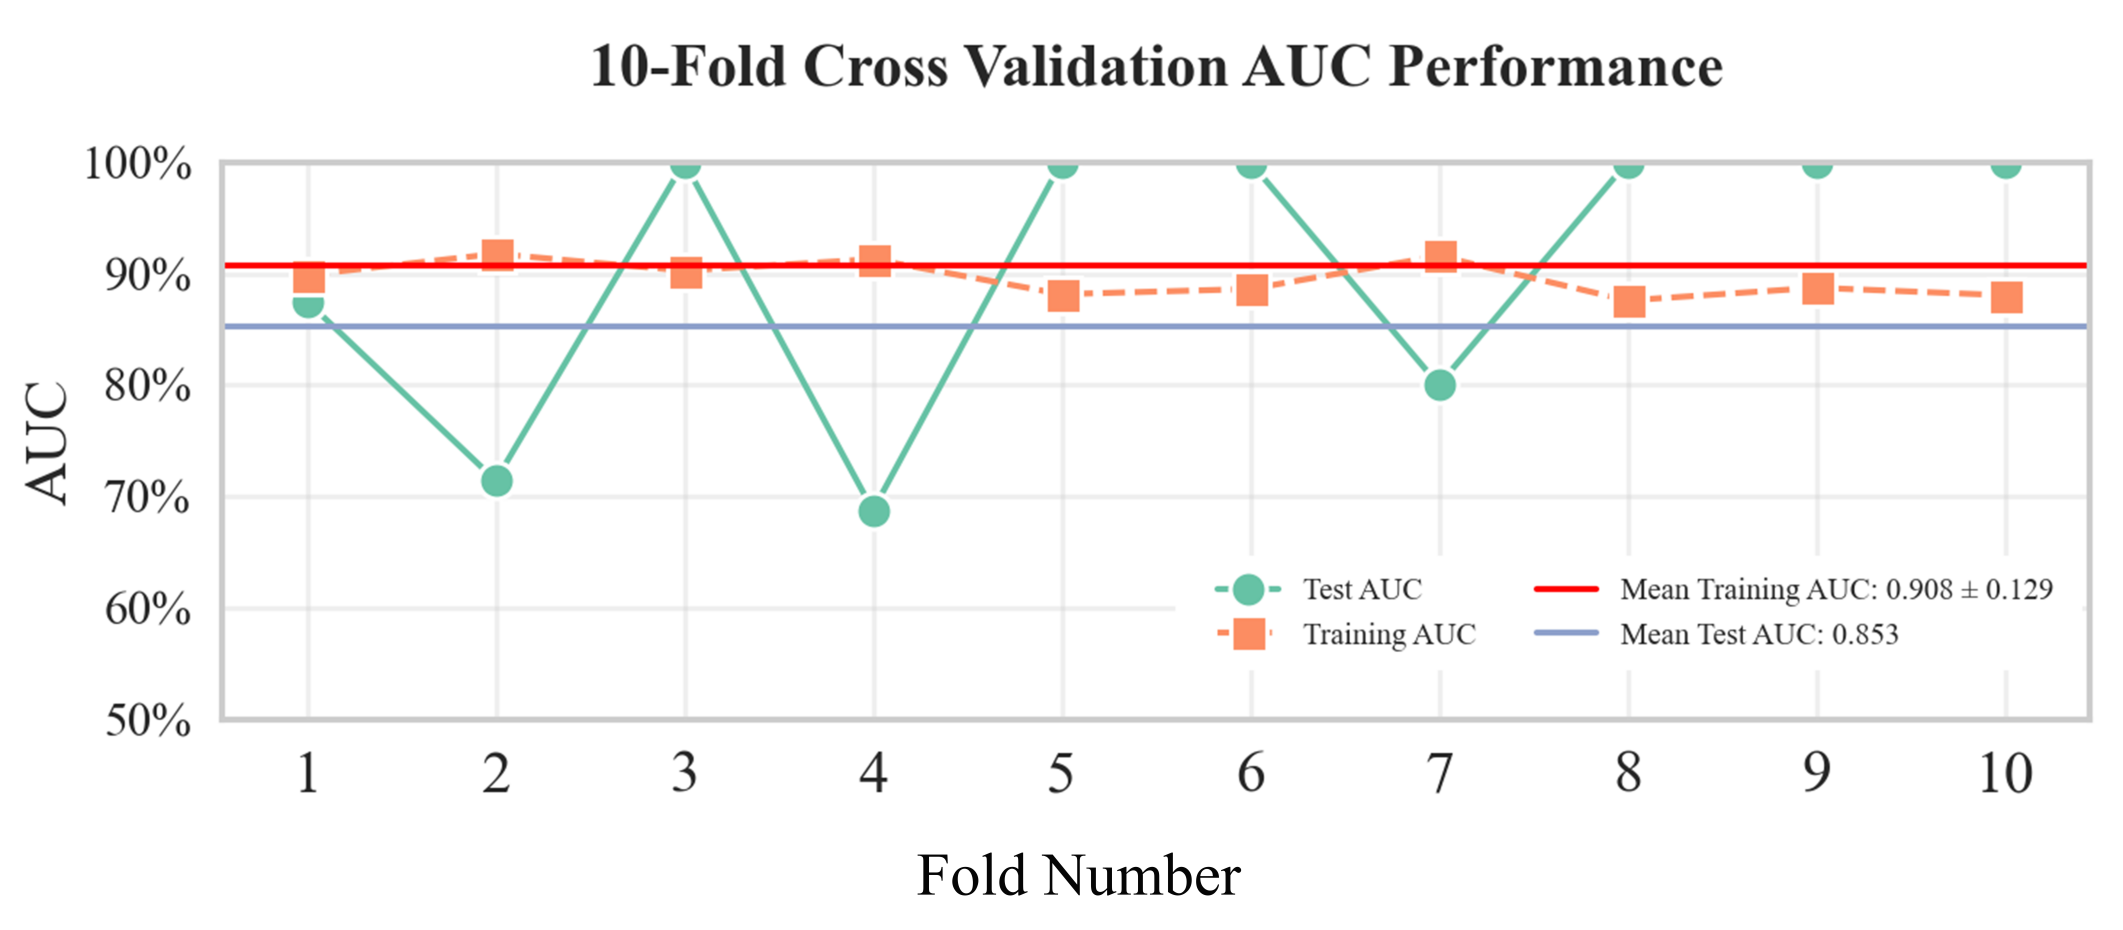


**Figure S1** The performance of the gross extrathyroidal extension (ETE)-predicting nomogram via 10-fold cross-validation in training and test cohorts
